# Supplementary material for: Disposable immunosensor for cortisol using functionalized magnetic particles
Source: Royal Society of Chemistry journal article supplement (doi:10.1039/c0an00206b), 2010-01-01

## Disposable immunosensor for cortisol using functionalized magnetic particles†

María Moreno-Guzmán, Marcos Eguílaz, Susana Campuzano, Araceli González-Cortés,

Paloma Yáñez-Sedeño, José M. Pingarrón\*

Department of Analytical Chemistry, Faculty of Chemistry, University Compuense of

Madrid, 28040-Madrid. Spain

E-mail: [yseo@quim.ucm.es](mailto:yseo@quim.ucm.es)

**Fig. S1** Differential pulse voltammograms performed with different modified electrodes at the  $EC_{50}$  value.

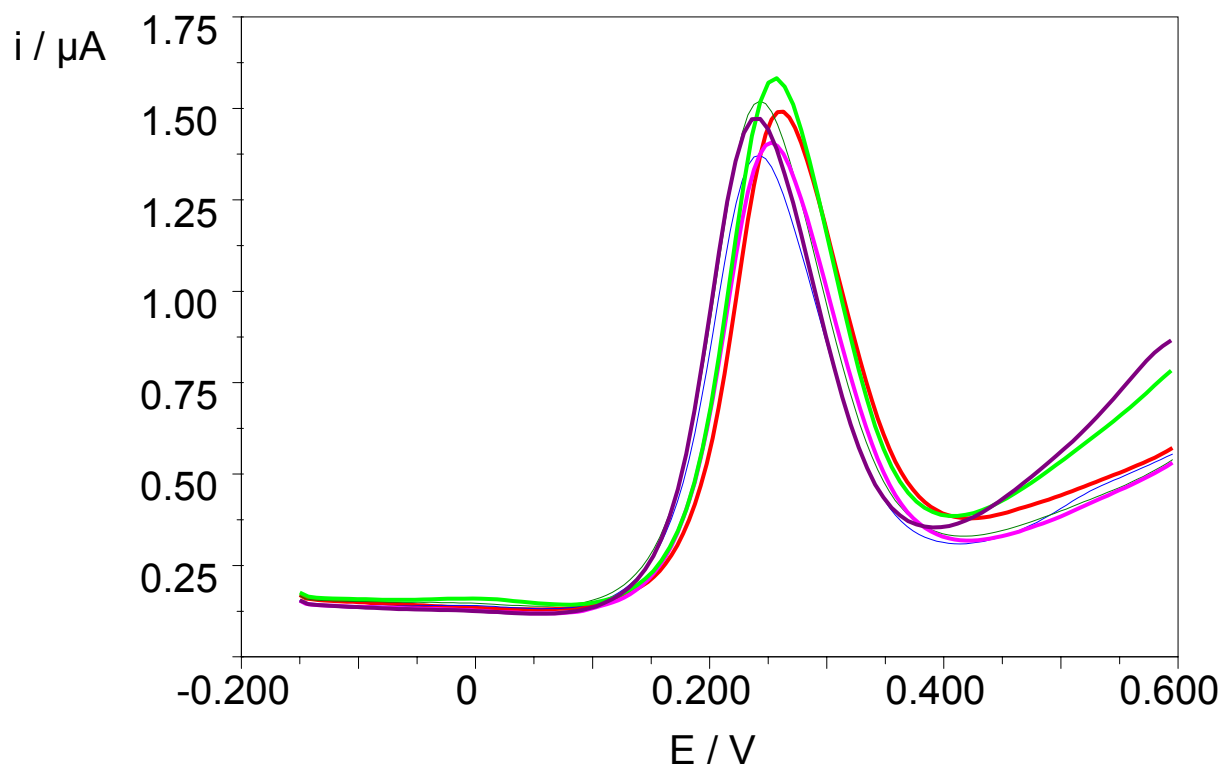

Supplement: c0an00206b.pdf [file c0an00206b.pdf]
